# Supplementary material for: Open Science in Suicide Research Is Open for Business
Source: Atypon-hosted journal article supplement (doi:10.1027/0227-5910/a000859), 2022-08-02
Supplement: 0227-5910_a000859_esm1.pdf [file 0227-5910_a000859_esm1.pdf]

**Open Science in Suicide Research is Open for Business: Supplementary materials.**

Olivia J. Kirtley, Julie J. Janssens, & Aleksandra Kaurin

<https://doi.org/10.1027/0227-5910/a000859>

We wanted to highlight the open science practices of as many researchers as possible, across a broad range of practices research types. Given a tight word limit, we opted to provide further examples here in the supplementary materials, and only a selection of examples in the manuscript text. This is by no means an exhaustive list of studies and researchers using open science practices. We intend to build a ‘living’ document, with examples of open science practices being used in the context of suicide and self-injury research. For the most up-to-date list and to submit content to the list, see <https://osf.io/v6y3t/>.

| Open science practice | Reference                                                                                                                                                                                                                                                                                                                                                                                              | Notes |
|-----------------------|--------------------------------------------------------------------------------------------------------------------------------------------------------------------------------------------------------------------------------------------------------------------------------------------------------------------------------------------------------------------------------------------------------|-------|
| <b>Preprints</b>      | Coppersmith, D. D., Fortgang, R., Kleiman, E., Millner, A., Yeager, A., Mair, P., & Nock, M. (2020). Frequent Assessment of Suicidal Thinking does not Increase Suicidal Thinking: Evidence from a High-Resolution Real-Time Monitoring Study. Retrieved from <a href="https://psyarxiv.com/6bh82">https://psyarxiv.com/6bh82</a>                                                                      |       |
|                       | DelPozo-Banos, M., Lee, S. C., Friedmann, Y., Akbari, A., Torabi, F., Lloyd, K., . . . John, A. (2021). Healthcare presentations with self-harm and the association with COVID-19: an e-cohort whole-population-based study using individual-level linked routine electronic health records in Wales, UK, 2016 - March 2021. <i>medRxiv</i> , 2021.2008.2013.21261861. doi:10.1101/2021.08.13.21261861 |       |
|                       | Dobias, M., Schleider, J. L., Jans, L., & Fox, K. (2021). An online, single-session intervention for adolescent self-injurious thoughts and behaviors: Results from a randomized trial. . <i>Preprint</i> . doi: <a href="https://doi.org/10.31234/osf.io/jprcg">https://doi.org/10.31234/osf.io/jprcg</a>                                                                                             |       |
|                       | Gallyer, A. J., Burani, K., Mulligan, E. M., Santopetro, N., Dougherty, S. P., Jeon, M. E., . . . Hajcak, G. (2021).                                                                                                                                                                                                                                                                                   |       |

|  |                                                                                                                                                                                                                                                                                                                              |  |
|--|------------------------------------------------------------------------------------------------------------------------------------------------------------------------------------------------------------------------------------------------------------------------------------------------------------------------------|--|
|  | Examining Blunted Initial Response to Reward and Recent Suicidal Ideation in Children and Adolescents Using Event-Related Potentials: Failure to Conceptually Replicate Across Two Independent Samples. <i>bioRxiv</i> , 2020.2005.2019.104208. doi:10.1101/2020.05.19.104208                                                |  |
|  | Kaurin, A., Wright, A. G., Hallquist, M., & Dombrovski, A. (2020). Momentary Interpersonal Processes of Suicidal Surges in Borderline Personality Disorder. <i>Preprint</i> . doi:https://doi.org/10.31234/osf.io/es35w                                                                                                      |  |
|  | Kiekens, G., Robinson, K., Tatnell, R., & Kirtley, O. J. (2021). Opening the Black Box of Daily Life in Non-Suicidal Self-Injury Research: With Great Opportunity Comes Great Responsibility. <i>Preprint</i> . doi:doi.org/10.31234/osf.io/yp86x                                                                            |  |
|  | Kirtley, O. J., Hussey, I., & Marzano, L. (2020). Exposure to and experience of self-harm and self-harm related content: An exploratory network analysis. <i>Preprint</i> . doi:https://doi.org/10.31234/osf.io/gyhzt                                                                                                        |  |
|  | Lawson, K. M., Kellerman, J. K., Kleiman, E., Bleidorn, W., Hopwood, C. J., & Robins, R. (2020). The Role of Temperament in the Onset of Suicidal Ideation and Behaviors across Adolescence: Findings from a 10-year Longitudinal Study of Mexican-Origin Youth. <i>Preprint</i> . doi:https://doi.org/10.31234/osf.io/96ez2 |  |
|  | O'Connor, D. B., Green, J., Ferguson, E., O'Carroll, R. E., &                                                                                                                                                                                                                                                                |  |

|                                     |                                                                                                                                                                                                                                                                                   |                                                           |
|-------------------------------------|-----------------------------------------------------------------------------------------------------------------------------------------------------------------------------------------------------------------------------------------------------------------------------------|-----------------------------------------------------------|
|                                     | O'Connor, R. C. (2018). Effects of childhood trauma on cortisol levels in suicide attempters and ideators. <i>Preprint</i> . doi: <a href="https://doi.org/10.1016/j.psyneuen.2017.11.004">https://doi.org/10.1016/j.psyneuen.2017.11.004</a>                                     |                                                           |
|                                     | Robinson, K., & Wilson, M. S. (2019). Open to interpretation? Inconsistent reporting of lifetime non-suicidal self-injury across two common assessments. <i>Preprint</i> . doi: <a href="https://doi.org/10.31234/osf.io/75z2w">https://doi.org/10.31234/osf.io/75z2w</a>         |                                                           |
|                                     | Tsypes, A., Kaurin, A., Wright, A. G., Hallquist, M., & Dombrovski, A. (2021, August 27). Protective Effects of Reasons for Living Against Suicidal Ideation in Daily Life. <a href="https://doi.org/10.31219/osf.io/z3dnj">https://doi.org/10.31219/osf.io/z3dnj</a>             |                                                           |
|                                     | Warne, N., Heron, J., Mars, B., Moran, P., Stewart, A., Munafò, M., . . . Bould, H. (2020). Comorbidity of self-harm and disordered eating in young people: Evidence from a UK population-based cohort. <i>medRxiv</i> , 2020.2007.2008.20148908. doi:10.1101/2020.07.08.20148908 |                                                           |
| <b>Sharing study materials/code</b> | Holman, M. S., & Williams, M. N. (2019). <i>Risk and Protective Factors for Suicide: A Network Analysis</i> . Open Science Framework Project. Retrieved from <a href="https://osf.io/f395g">osf.io/f395g</a>                                                                      | Shared measures (questionnaires), data, and analysis code |
|                                     | Robinson, K., & Wilson, M. S. (2020). <i>Measurement of Non-Suicidal Self-Injury</i> . Open Science Framework Project.                                                                                                                                                            | Shared measures (questionnaires), data, and analysis code |
|                                     | Dobias, M., Schleider, J. L., Jans, L., & Fox, K. (2021). <i>An online, single-session intervention for adolescent self-injurious thoughts and behaviors: Results from a</i>                                                                                                      | Shared intervention, analysis code, and data.             |

|  |                                                                                                                                                                                                                                                                                                                                                                                   |                                                                     |
|--|-----------------------------------------------------------------------------------------------------------------------------------------------------------------------------------------------------------------------------------------------------------------------------------------------------------------------------------------------------------------------------------|---------------------------------------------------------------------|
|  | <p><i>randomized trial</i>. Open Science Framework Project.<br/> <a href="https://doi.org/10.17605/OSF.IO/WFDZP">https://doi.org/10.17605/OSF.IO/WFDZP</a></p>                                                                                                                                                                                                                    |                                                                     |
|  | <p>Fox, K., &amp; Wang, S. B. (2020). <i>Online Methods in Adolescent Self-Injury Research: Challenges and Recommendations</i>. Open Science Framework Project. Retrieved from <a href="https://osf.io/g6cha">osf.io/g6cha</a></p>                                                                                                                                                | Study recruitment materials                                         |
|  | <p>Kaurin, A., Wright, A. G., Dombrowski, A., &amp; Hallquist, M. (2020). Momentary Interpersonal Processes of Suicidal Surges in Borderline Personality Disorder. . Open Science Framework Project. Retrieved from <a href="https://osf.io/zpc3u">osf.io/zpc3u</a></p>                                                                                                           | Shared analysis code                                                |
|  | <p>Kirtley, O. J., Hussey, I., &amp; Marzano, L. (2020). <i>Exposure to and experience of self-harm and self-harm related content: An exploratory network analysis</i>. . Open Science Framework Project.</p>                                                                                                                                                                     | Shared measures (questionnaires), synthetic data, and analysis code |
|  | <p>Kothgassner, O., Robinson, K., Goreis, A., Ougrin, D., &amp; Plener, P. (2020). <i>Therapeutic interventions for self-harm and suicidal ideation in adolescents</i>. Open Science Framework Project.</p>                                                                                                                                                                       | Shared data and analysis code (for meta-analysis)                   |
|  | <p>Lawson, K. M., Kellerman, J. K., Kleiman, E., Bleidorn, W., Hopwood, C. J., &amp; Robins, R. (2020). <i>The Role of Temperament in the Onset of Suicidal Ideation and Behaviors across Adolescence: Findings from a 10-year Longitudinal Study of Mexican-Origin Youth</i>. Open Science Framework Project. Retrieved from <a href="https://osf.io/j7vfb">osf.io/j7vfb</a></p> | Shared analysis code, codebook, and study questionnaires            |
|  | <p>Sandford, D. M., Kirtley, O. J., Lafit, G., Thwaites, R., &amp; O'Connor, R. C. (2020). An Investigation Into the Factor Structure of the Attitudes to Suicide Prevention Scale. <i>Crisis</i>,</p>                                                                                                                                                                            | Shared analysis code                                                |

|                        |                                                                                                                                                                                                                                                                                                                           |                                         |
|------------------------|---------------------------------------------------------------------------------------------------------------------------------------------------------------------------------------------------------------------------------------------------------------------------------------------------------------------------|-----------------------------------------|
|                        | 41(2), 97-104.<br>doi:10.1027/0227-5910/a000608                                                                                                                                                                                                                                                                           |                                         |
|                        | Sandford, D. M., Kirtley, O. J., Thwaites, R., Dagnan, D., & O'Connor, R. C. (2021). The Adaptation of a Measure of Confidence in Assessing, Formulating, and Managing Suicide Risk. <i>Crisis</i> . doi:10.1027/0227-5910/a000830                                                                                        | Shared analysis code and synthetic data |
| <b>Preregistration</b> | Bandara, P., & Knipe, D. (2021, August 24). Intimate partner violence and suicidal behaviour in Sri Lanka: Analysis plan using national data. <a href="https://doi.org/10.17605/OSF.IO/KJ5C6">https://doi.org/10.17605/OSF.IO/KJ5C6</a>                                                                                   |                                         |
|                        | Canter, B., Hart, J., Clayton, M. G., M.A., Prinstein, M. J., & Solomon, S. (2021, March 12). Exploring the associations between loneliness, distress, and flourishing and suicidal ideation/suicide attempts. <a href="https://doi.org/10.17605/OSF.IO/4GRKQ">https://doi.org/10.17605/OSF.IO/4GRKQ</a>                  |                                         |
|                        | Dobias, M., Schleider, J. L., Jans, L., & Fox, K. (2021). <i>An online, single-session intervention for adolescent self-injurious thoughts and behaviors: Results from a randomized trial</i> . Open Science Framework Project. <a href="https://doi.org/10.17605/OSF.IO/WFDZP">https://doi.org/10.17605/OSF.IO/WFDZP</a> |                                         |
|                        | Holman, M. S., & Williams, M. N. (2019). <i>Risk and Protective Factors for Suicide: A Network Analysis</i> . Open Science Framework Project. Retrieved from <a href="https://osf.io/f395g">osf.io/f395g</a>                                                                                                              |                                         |
|                        | Kaurin, A., Wright, A. G., Hisler, G., Dombrovski, A., & Hallquist, M. (2020). Sleep and Next-Day Suicidal Ideation in Persons with Borderline Personality Disorder. Open Science Framework.                                                                                                                              |                                         |

|                     |                                                                                                                                                                                                                                                                                                                                    |  |
|---------------------|------------------------------------------------------------------------------------------------------------------------------------------------------------------------------------------------------------------------------------------------------------------------------------------------------------------------------------|--|
|                     | <a href="https://doi.org/10.17605/OSF.IO/4VUGK">https://doi.org/10.17605/OSF.IO/4VUGK</a>                                                                                                                                                                                                                                          |  |
|                     | Knipe, D., & Rajapakse, T. (2021). <i>Self-poisoning in Sri Lanka - COVID19 (Analysis plan)</i> . OSF Preregistration. <a href="https://doi.org/10.17605/OSF.IO/4ZFNS">https://doi.org/10.17605/OSF.IO/4ZFNS</a>                                                                                                                   |  |
|                     | Knipe, D., Evans, H., Marchant, A., Gunnell, D., & John, A. (2020). <i>Mapping population mental health concerns related to COVID-19 and the consequences of physical distancing: a Google trends analysis</i> . Open Science Framework. <a href="https://doi.org/10.17605/OSF.IO/PXGTE">https://doi.org/10.17605/OSF.IO/PXGTE</a> |  |
|                     | Robinson, K., & Wilson, M. S. (2020). <i>Measurement of Non-Suicidal Self-Injury</i> . Open Science Framework Project. <a href="https://doi.org/10.17605/OSF.IO/8GWJU">https://doi.org/10.17605/OSF.IO/8GWJU</a>                                                                                                                   |  |
|                     | Warne, N., Heron, J., Mars, B., Solmi, F., Moran, P., Stewart, A., . . . Bould, H. (2020). <i>Emotion dysregulation, self-harm and disordered eating: A protocol for a mechanistic investigation</i> . . Open Science Framework. <a href="https://doi.org/10.17605/OSF.IO/DPCJB">https://doi.org/10.17605/OSF.IO/DPCJB</a>         |  |
| <b>Sharing data</b> | Dobias, M., Schleider, J. L., Jans, L., & Fox, K. (2021). An online, single-session intervention for adolescent self-injurious thoughts and behaviors: Results from a randomized trial. Open Science Framework Project. <a href="https://doi.org/10.17605/OSF.IO/WFDZP">https://doi.org/10.17605/OSF.IO/WFDZP</a>                  |  |
|                     | Holman, M. S., & Williams, M. N. (2019). <i>Risk and Protective Factors for Suicide: A Network Analysis</i> . Open Science Framework Project. Retrieved from <a href="https://osf.io/f395g">osf.io/f395g</a>                                                                                                                       |  |

|  |                                                                                                                                                                                                                                                                                                                                           |                    |
|--|-------------------------------------------------------------------------------------------------------------------------------------------------------------------------------------------------------------------------------------------------------------------------------------------------------------------------------------------|--------------------|
|  | <p>Kirtley, O. J., Rodham, K., &amp; Crane, C. (2019). Understanding suicidal ideation and behaviour in individuals with chronic pain: A review of the role of novel transdiagnostic psychological factors. Open Science Framework Project. <a href="https://doi.org/10.17605/OSF.IO/6UPKA">https://doi.org/10.17605/OSF.IO/6UPKA</a></p> | Narrative review   |
|  | <p>Kothgassner, O., Robinson, K., Goreis, A., Ougrin, D., &amp; Plener, P. (2020). <i>Therapeutic interventions for self-harm and suicidal ideation in adolescents</i>. Open Science Framework Project. <a href="https://doi.org/10.17605/OSF.IO/VR52S">https://doi.org/10.17605/OSF.IO/VR52S</a></p>                                     | Meta-analysis      |
|  | <p>Knipe, D., &amp; Rajapakse, T. (2021). <i>Self-poisoning in Sri Lanka - COVID19 (Analysis plan)</i>. OSF Preregistration. <a href="https://doi.org/10.17605/OSF.IO/4ZFNS">https://doi.org/10.17605/OSF.IO/4ZFNS</a></p>                                                                                                                |                    |
|  | <p>Knipe, D., Evans, H., Marchant, A., Gunnell, D., &amp; John, A. (2020). Mapping population mental health concerns related to COVID-19 and the consequences of physical distancing: a Google trends analysis. Open Science Framework. <a href="https://doi.org/10.17605/OSF.IO/PXGTE">https://doi.org/10.17605/OSF.IO/PXGTE</a></p>     | Google Trends data |
|  | <p>Millner, A. (2016). Single-Item Measurement of Suicidal Behaviors: Validity and Consequences of Misclassification. Open Science Framework. Retrieved from <a href="https://osf.io/nhrt4">osf.io/nhrt4</a></p>                                                                                                                          |                    |
|  | <p>Pirkis, J., John, A., Shin, S., DelPozo-Banos, M., Arya, V., Analuisa-Aguilar, P., . . . Spittal, M. J. (2021). Suicide trends in the early months of the COVID-19 pandemic: an interrupted time-series analysis of</p>                                                                                                                |                    |



|                    |                                                                                                                                                                                                                                                                                                                                                                                                       |                                                                                                                                                                                                                                                                                                        |
|--------------------|-------------------------------------------------------------------------------------------------------------------------------------------------------------------------------------------------------------------------------------------------------------------------------------------------------------------------------------------------------------------------------------------------------|--------------------------------------------------------------------------------------------------------------------------------------------------------------------------------------------------------------------------------------------------------------------------------------------------------|
|                    | preliminary data from 21 countries. <i>The Lancet Psychiatry</i> , 8(7), 579-588.<br>doi:10.1016/s2215-0366(21)00091-2                                                                                                                                                                                                                                                                                |                                                                                                                                                                                                                                                                                                        |
|                    | Robinson, K., & Wilson, M. S. (2020). <i>Measurement of Non-Suicidal Self-Injury</i> . Open Science Framework Project.<br><a href="https://doi.org/10.17605/OSF.IO/8GWJU">https://doi.org/10.17605/OSF.IO/8GWJU</a>                                                                                                                                                                                   |                                                                                                                                                                                                                                                                                                        |
|                    | Tello, N., Harika-Germaneau, G., Serra, W., Jaafari, N., & Chatard, A. (2020). Forecasting a Fatal Decision: Direct Replication of the Predictive Validity of the Suicide-Implicit Association Test. <i>Psychological science</i> , 31(1), 65–74.<br><a href="https://doi.org/10.1177/0956797619893062">https://doi.org/10.1177/0956797619893062</a>                                                  | Replication of: Nock, M. K., Park, J. M., Finn, C. T., Deliberto, T. L., Dour, H. J., & Banaji, M. R. (2010). Measuring the suicidal mind implicit cognition predicts suicidal behavior. <i>Psychological Science</i> , 21, 511-517.                                                                   |
| <b>Replication</b> | Coppersmith, D. L. Kleiman, E. M., Fortgang, R. G., Millner, A. J. & Nock, M. K. (2021). Social Support as a Dynamic Protective Factor for Suicidal Thinking: A Replication. Presented at the International Academy of Suicide Research – American Foundation for Suicide Prevention Summit, online, October 24 <sup>th</sup> – 27 <sup>th</sup> 2021.                                                | Replication of: Coppersmith, D. D. L., Kleiman, E. M., Glenn, C. R., Millner, A. J., & Nock, M. K. (2019). The dynamics of social support among suicide attempters: A smartphone-based daily diary study. <i>Behav Res Ther</i> , 120, 103348.<br>doi:10.1016/j.brat.2018.11.016                       |
|                    | Gallyer, A. J., Burani, K., Mulligan, E. M., Santopetro, N., Dougherty, S. P., Jeon, M. E., . . . Hajcak, G. (2021). Examining Blunted Initial Response to Reward and Recent Suicidal Ideation in Children and Adolescents Using Event-Related Potentials: Failure to Conceptually Replicate Across Two Independent Samples. <i>bioRxiv</i> , 2020.2005.2019.104208.<br>doi:10.1101/2020.05.19.104208 | Replication of: Tsypes, A., Owens, M., & Gibb, B. E. (2019). Blunted Neural Reward Responsiveness in Children With Recent Suicidal Ideation. <i>Clinical Psychological Science</i> , 216770261985634.<br><a href="https://doi.org/10.1177/216770261985634">https://doi.org/10.1177/216770261985634</a> |
|                    | Kleiman, E. M., Turner, B. J., Fedor, S., Beale, E. E., Huffman,                                                                                                                                                                                                                                                                                                                                      | Internal conceptual replication                                                                                                                                                                                                                                                                        |

|  |                                                                                                                                                                                                                                           |                                                                                                            |
|--|-------------------------------------------------------------------------------------------------------------------------------------------------------------------------------------------------------------------------------------------|------------------------------------------------------------------------------------------------------------|
|  | J. C., & Nock, M. K. (2017). Examination of real-time fluctuations in suicidal ideation and its risk factors: Results from two ecological momentary assessment studies. <i>J Abnorm Psychol</i> , 126(6), 726-738. doi:10.1037/abn0000273 |                                                                                                            |
|  | Lam, B., & Stewart, J. (2021). Replicability in Youth Suicide Research. Open Science Framework Project. <a href="https://doi.org/10.17605/OSF.IO/W8ZXM">https://doi.org/10.17605/OSF.IO/W8ZXM</a>                                         | Ongoing project to estimate the replicability of a random sample of ~80 studies in youth suicide research. |
